# Supplementary material for: Corrosion Protective Film Formation on Mg Alloy AZ31 by Exposure to Dilute Selenite Solutions
Source: MDPI journal article supplement (doi:10.3390/ma14020286), 2021-01-08
Supplement: s1 [file s1]

## EIS Bode Plots

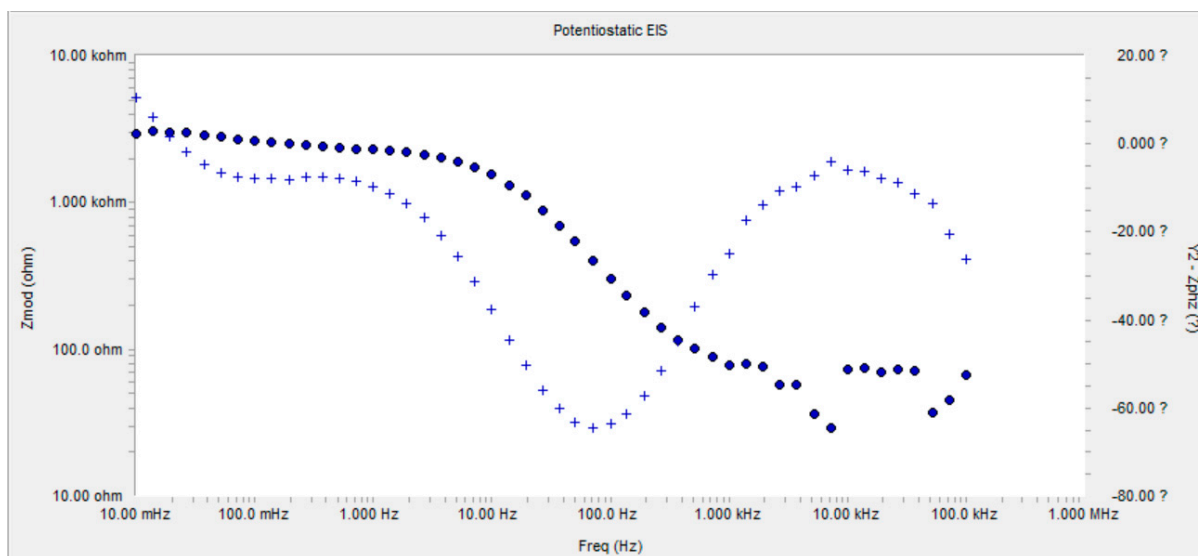

**Figure S1.** Bode plot for control.

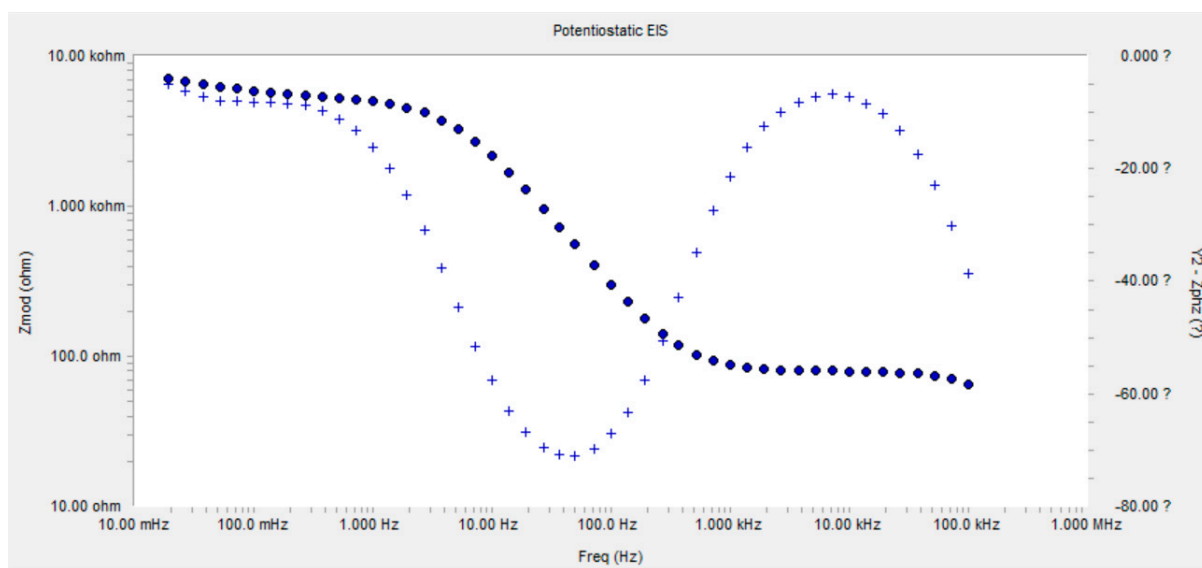

**Figure S2.** Bode Plot for 1 mM Selenite.

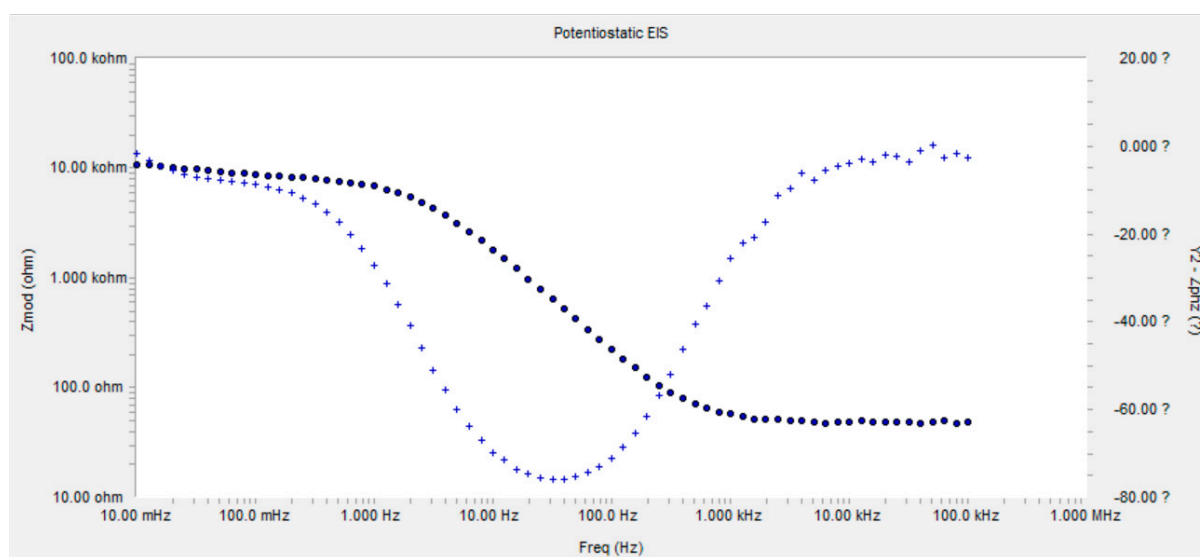

Figure S3. Bode Plot for 5 mM Selenite.

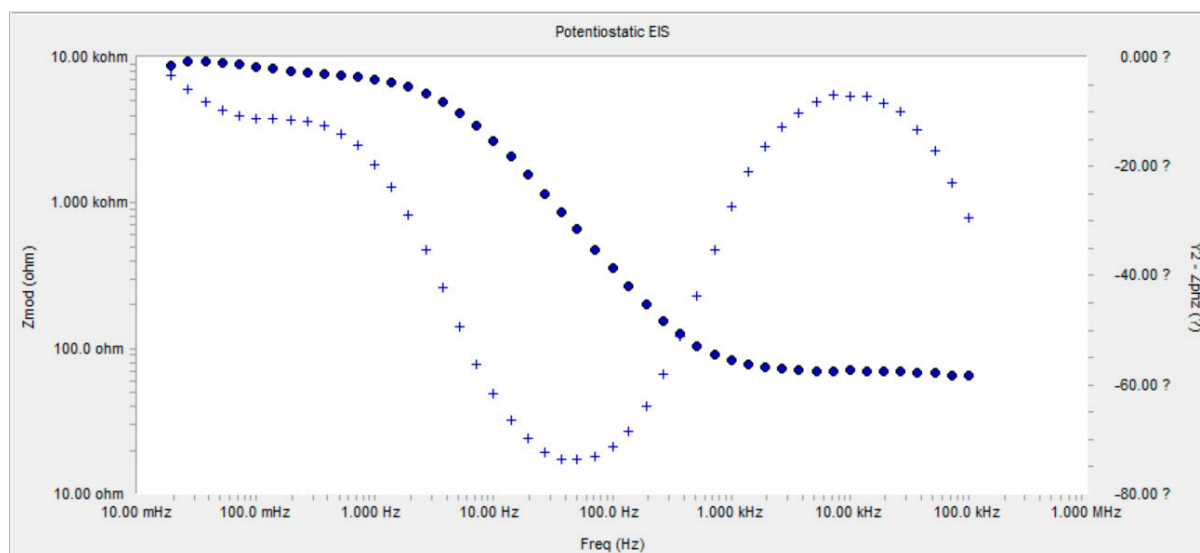

Figure S4. Bode Plot for 10 mM Selenite.
